# Supplementary material
Source: HighWire-hosted journal article supplement (https://www.rcpjournals.org/highwire/filestream/13058/field_highwire_adjunct_files/0/Han_Supplementary_material_S1.pdf)
Supplement: Han_Supplementary_material_S1.pdf [file Han_Supplementary_material_S1.pdf]

**Supplementary Table S1.** Characteristics of 14878 men aged 18.0-104.1 years (mean = 63.9  $\pm$ SD = 19.3 years) and 17392 women aged 18.0-106.7 (mean = 64.1  $\pm$ SD = 21.6years).

| <b>Index admissions</b>                                   | n         | %    |
|-----------------------------------------------------------|-----------|------|
| Sepsis                                                    | 1170      | 3.6  |
| Viral infections                                          | 145       | 0.4  |
| Haematological disorders                                  | 676       | 2.1  |
| Endocrine disorders                                       | 1084      | 3.4  |
| Psychiatric disorders                                     | 279       | 0.9  |
| Neurological disorders                                    | 722       | 2.2  |
| Ophthalmic disorders                                      | 163       | 0.5  |
| All cardiovascular disorders                              | 4416      | 13.7 |
| <i>Myocardial infarct*</i>                                | 796       | 2.5  |
| <i>Atrial fibrillation*</i>                               | 399       | 1.2  |
| <i>Congestive heart failure*</i>                          | 405       | 1.3  |
| All pulmonary disorders                                   | 3367      | 10.4 |
| <i>Asthma*</i>                                            | 207       | 0.6  |
| <i>Chronic obstructive pulmonary disease*</i>             | 470       | 1.5  |
| <i>Pneumonia*</i>                                         | 1692      | 5.2  |
| Gastrointestinal disorders                                | 4144      | 12.8 |
| Dermatological disorders                                  | 1083      | 3.4  |
| Rheumatological disorders                                 | 3169      | 9.8  |
| All genitourinary disorders                               | 3686      | 11.4 |
| <i>Urinary tract infection*</i>                           | 1116      | 3.5  |
| Non-specific bodily pain                                  | 4344      | 13.5 |
| Bone fractures                                            | 2624      | 8.1  |
| <i>Hip fractures*</i>                                     | 639       | 2.0  |
| Medical device-related complications                      | 1015      | 3.1  |
| Others (not specified)                                    | 183       | 0.6  |
| <b>Number of readmissions within 28 days of discharge</b> |           |      |
| None                                                      | 28548     | 88.5 |
| 1 readmission                                             | 2666      | 8.3  |
| $\geq 2$ readmissions                                     | 1056      | 3.3  |
| <b>Types of readmission</b>                               |           |      |
| 1 non-identical AR episode/1 readmission                  | 2476/2666 | 92.9 |
| $\geq 2$ non-identical AR episodes/ $\geq 2$ readmissions | 949/1056  | 89.9 |
| 1 identical AR episode/1 readmission                      | 190/2666  | 7.1  |
| $\geq 2$ identical AR episodes/ $\geq 2$ readmissions     | 107/1056  | 10.1 |
| <b>Mortality status</b>                                   |           |      |
| Death within 30 days of first admission                   | 834       | 2.6  |
| Death within six months of first admission <sup>†</sup>   | 2192      | 6.8  |
| Death within a two-year period                            | 3305      | 10.2 |

\*Specific conditions within categories of disorders; <sup>†</sup>This group includes those who died within 30 days of admission
